# Supplementary material for: Toscana virus non-structural protein NSs acts as E3 ubiquitin ligase promoting RIG-I degradation
Source: PLoS Pathog. 2019 Dec 9;15(12):e1008186. doi: 10.1371/journal.ppat.1008186 (PMC6901176; doi:10.1371/journal.ppat.1008186)
Supplement: S4 Dataset — RIG-I expression levels were quantified by densitometric analysis on immunoblotting performed on cell lysates of RIG-I and NSs, wild-type or cystein mutant, co-transfected cells. Raw dataset represented the band intensity for RIG-I, wt-NSs, NSsC27G and actin. Fold induction/decrease in protein expression levels was calculated after actin normalization. Immunofluorescence results performed for RIG-I or NSs immune-staining were given. Positive cells for both RIG-I or NSs were counted; results were expressed as percentage of positive cells with respect to the total number of tested cells. Reporter gene assay was used to determine the effects of cysteine mutated NSs on RIG-I-mediated IFN-β promoter activation. Luciferase reporter gene assay was performed and fold induction in IFN-β promoter activation was calculated for each sample after normalization of the signal with the pSV40-RenLuc internal control. For all the experimental procedures, results were collected from three independent experiments and expressed as mean values ± standard deviations (SD). A p value of less than 0.05 was considered statistically significant. (XLS) [file ppat.1008186.s011.xls]

## Sheet: Densitometric analysis
AREA OF RIG-I BANDS	SAMPLES	EXP.1	EXP.2	EXP.3	MEAN	FOLD INCREASE/DECREASE	SD	p value (sample vs. RIG-I)
	RIG-I	117896	81870.9	133667	111144	1	23746.7
	RIG-I + wt-NSs	16497.6	1686.48	13944.7	10709.6	0.0963574	7081.91	0.003285
	RIG-I + C27G-NSs	69871.4	7764.68	127142	68259.3	0.614149	53401.7	0.319112
AREA OF ACTIN BANDS	SAMPLES	EXP.1	EXP.2	EXP.3	MEAN	FOLD INCREASE/DECREASE	SD	p value (sample vs. RIG-I)
	RIG-I	29453.9	24198.1	40933.6	31528.5	0.999998	7654.91
	RIG-I + wt-NSs	46882.6	24881.8	33898.2	35220.9	1.11711	9892.26	0.671182
	RIG-I + C27G-NSs	34120.4	21237.1	42178.4	32512	1.03119	9447.76	0.906335

## Sheet: IFA counts
RIG-I COUNTS	SAMPLES	EXP. 1	EXP. 2	EXP. 3	MEAN	SD	MEAN % OF RIG-I POSITIVE CELLS	p VALUE (sample vs. RIG-I)	p VALUE (sample vs. NSs)	TOTAL CELLS
	RIG-I	280	320	306	302	20.2978	1.00667			30000 ± 5000
	RIG-I + wt-NSs	70	53	58	60.3333	8.73689	0.201111	4.6e-05		30000 ± 5000
	RIG-I + C27G-NSs	162	272	299	244.333	72.5695	0.814444	0.255646	0.01261	30000 ± 5000

## Sheet: Luciferase reporter assay
LUCIFERASE FOLD INDUCTION	SAMPLES	EXP. 1	EXP. 2	EXP. 3	MEAN	SD	FOLD INCREASE/DECREASE	p VALUE (sample vs. RIG-I)	p VALUE (wt-NSs vs. C27G-NSs)
	Mock	1	1	1	1
	RIG-I	35.01	40.793	34.06	36.62	3.64	1
	RIG-I + wt-NSs	15.541	24.334	18.652	19.51	4.46	0.532769	0.005
	RIG-I + C27G-NSs	32.13	37.16	26.19	31.83	5.49	0.869197	0.273	0.037
